# Supplementary material
Source: publisher site journal article supplement (https://www.degruyterbrill.com/publication/isbn/9783486837889/downloadAsset/9783486837889_Errata.pdf)
Supplement: Supplementary file 1 [file 9783486837889_Errata.pdf]

## Korrigenda

zu Behrens/Hilligweg/Kirspel, Übungsbuch zur Volkswirtschaftslehre, München Wien (Oldenbourg Verlag) 2005:

| <i>Ort</i>                         | <i>Zu ersetzen ist</i>         | <i>durch</i>                        |
|------------------------------------|--------------------------------|-------------------------------------|
| S. 6: Aufgabe I.11 c) 7.Zeile      | Monat                          | Jahr                                |
| S. 22: Aufgabe I.25                | Angebot : $p = 200 + 0,6x$     | Angebot: $p = 200 + 6x$             |
| S. 56: Aufgabe IV.10 (1)           | $U = (x_1 + 10) \cdot x_2 - 2$ | $U = (x_1 + 2) \cdot (x_2 + 1) - 2$ |
| S. 123: Aufgabe I.24 a) 2.Zeile    | $35 - x = 0,05 \cdot x + 5$    | $35 - x = 0,5 \cdot x + 5$          |
| S. 158: Aufgabe IV.15 b) 4.Zeile   | 9400                           | 19000                               |
| S. 161: Aufgabe IV.19 a) 2.Zeile   | 12000                          | 8000                                |
| S. 162: Aufgabe IV.21, 2.Zeile     | Engelsche                      | Einkommen-Konsum-                   |
| S. 163: Aufgabe IV.21, 3.Zeile     | inferiores Gut                 | Inferiores Gut ab $I_4$             |
| S. 179: Aufgabe IV.40, a) 1. Zeile | $v_1^{0,7}$                    | $v_1^{-0,7}$                        |

Zudem ist auf S. 123, Aufgabe I.24 b) die folgende Lösung korrekt, zumal in der zugehörigen Aufgabe auf der S. 22 nicht explizit gefordert wird, dass nur die Anbieter mit den niedrigsten Kosten die Güter anbieten:

$$75 \leq U^{\text{netto}} \leq 225; \quad KR = 50; \quad 25 \leq G \leq 175;$$

$$[\text{Nachrichtlich: } U^{\text{brutto}} = 300; \quad E = 250; \quad 75 \leq K \leq 225]$$
